# Supplementary material
Source: PubMed Central journal article supplement (PMC1266424)
Supplement: mbc_E05-06-0527_3.pdf [file mbc_E05-06-0527_3.pdf]

## Supplemental table 1 – Strains used in this study

| Strain code | Description                             | Genotype                                                                                                                                                                                                                                                                                                                               | Source                      |
|-------------|-----------------------------------------|----------------------------------------------------------------------------------------------------------------------------------------------------------------------------------------------------------------------------------------------------------------------------------------------------------------------------------------|-----------------------------|
| Y-187       | 2-hybrid prey                           | <i>MAT<math>\alpha</math></i> , <i>ade2-101</i> , <i>leu2-3,112</i> , <i>his3-200</i> , <i>trp1-901</i> , <i>ura3-52</i> , <i>met-</i> , <i>gal4<math>\Delta</math></i> , <i>gal80<math>\Delta</math></i> , <i>URA3::GAL1<sub>UAS</sub>-GAL1<sub>TATA</sub>-LacZ</i>                                                                   | Fromont-Racine et al., 1997 |
| CG1945      | 2-hybrid bait                           | <i>MAT<math>\alpha</math></i> , <i>ade2-101</i> , <i>leu2-3,112</i> , <i>his3-200</i> , <i>trp1-901</i> , <i>ura3-52</i> , <i>lys2-801</i> , <i>gal4-542</i> , <i>gal80-538</i> , <i>LYS2::GAL1<sub>UAS</sub>-GAL1<sub>TATA</sub>-HIS3</i> , <i>URA3::GAL4<sub>17mers(x3)</sub>-CYC1<sub>TATA</sub>-lacZ</i> , <i>cyh<sup>r</sup>2</i> | Fromont-Racine et al., 1997 |
| FYAT 270-S5 |                                         | <i>MAT<math>\alpha</math></i> , <i>leu2<math>\Delta</math>0</i> , <i>trp1<math>\Delta</math>63</i> , <i>ura3-53</i> , <i>arg8<math>\Delta</math>0</i> , <i>met14<math>\Delta</math>0</i> , <i>lys2<math>\Delta</math>202</i> , <i>P2LEU2</i>                                                                                           | Loeillet et al., 2005       |
| YV460       | <i>nup133<math>\Delta</math> P2LEU2</i> | <i>MAT<math>\alpha</math></i> , <i>leu2<math>\Delta</math>0</i> , <i>trp1<math>\Delta</math>63</i> , <i>ura3-53</i> , <i>arg8<math>\Delta</math>0</i> , <i>met14<math>\Delta</math>0</i> , <i>lys2<math>\Delta</math>202</i> , <i>P2LEU2</i> , <i>nup133::URA3</i>                                                                     | Loeillet et al., 2005       |
| BY4742      |                                         | <i>MAT<math>\alpha</math></i> , <i>leu2<math>\Delta</math>0</i> , <i>his3<math>\Delta</math>1</i> , <i>ura3<math>\Delta</math>0</i> , <i>lys2<math>\Delta</math>0</i>                                                                                                                                                                  | Winzeler et al., 1999       |
| Y15998      | <i>nup133<math>\Delta</math></i>        | <i>MAT<math>\alpha</math></i> , <i>leu2<math>\Delta</math>0</i> , <i>his3<math>\Delta</math>1</i> , <i>ura3<math>\Delta</math>0</i> , <i>lys2<math>\Delta</math>0</i> , <i>nup133::KanMX6</i> ,                                                                                                                                        | Winzeler et al., 1999       |
| Y16507      | <i>pml39<math>\Delta</math></i>         | <i>MAT<math>\alpha</math></i> , <i>leu2<math>\Delta</math>0</i> , <i>his3<math>\Delta</math>1</i> , <i>ura3<math>\Delta</math>0</i> , <i>lys2<math>\Delta</math>0</i> , <i>pml39::KanMX6</i> ,                                                                                                                                         | Winzeler et al., 1999       |
| Y14906      | <i>nup120<math>\Delta</math></i>        | <i>MAT<math>\alpha</math></i> , <i>leu2<math>\Delta</math>0</i> , <i>his3<math>\Delta</math>1</i> , <i>ura3<math>\Delta</math>0</i> , <i>lys2<math>\Delta</math>0</i> , <i>nup120::KanMX6</i> ,                                                                                                                                        | Winzeler et al., 1999       |
| Y16570      | <i>pom152<math>\Delta</math></i>        | <i>MAT<math>\alpha</math></i> , <i>leu2<math>\Delta</math>0</i> , <i>his3<math>\Delta</math>1</i> , <i>ura3<math>\Delta</math>0</i> , <i>lys2<math>\Delta</math>0</i> , <i>pom152::KanMX6</i> ,                                                                                                                                        | Winzeler et al., 1999       |
| Y11573      | <i>pom34<math>\Delta</math></i>         | <i>MAT<math>\alpha</math></i> , <i>leu2<math>\Delta</math>0</i> , <i>his3<math>\Delta</math>1</i> , <i>ura3<math>\Delta</math>0</i> , <i>lys2<math>\Delta</math>0</i> , <i>pom34::KanMX6</i> ,                                                                                                                                         | Winzeler et al., 1999       |
| Y13105      | <i>nup170<math>\Delta</math></i>        | <i>MAT<math>\alpha</math></i> , <i>leu2<math>\Delta</math>0</i> , <i>his3<math>\Delta</math>1</i> , <i>ura3<math>\Delta</math>0</i> , <i>lys2<math>\Delta</math>0</i> , <i>nup170::KanMX6</i> ,                                                                                                                                        | Winzeler et al., 1999       |
| Y13551      | <i>nup42<math>\Delta</math></i>         | <i>MAT<math>\alpha</math></i> , <i>leu2<math>\Delta</math>0</i> , <i>his3<math>\Delta</math>1</i> , <i>ura3<math>\Delta</math>0</i> , <i>lys2<math>\Delta</math>0</i> , <i>nup42::KanMX6</i> ,                                                                                                                                         | Winzeler et al., 1999       |
| Y14917      | <i>nup100<math>\Delta</math></i>        | <i>MAT<math>\alpha</math></i> , <i>leu2<math>\Delta</math>0</i> , <i>his3<math>\Delta</math>1</i> , <i>ura3<math>\Delta</math>0</i> , <i>lys2<math>\Delta</math>0</i> , <i>nup100::KanMX6</i> ,                                                                                                                                        | Winzeler et al., 1999       |
| Y15244      | <i>nup2<math>\Delta</math></i>          | <i>MAT<math>\alpha</math></i> , <i>leu2<math>\Delta</math>0</i> , <i>his3<math>\Delta</math>1</i> , <i>ura3<math>\Delta</math>0</i> , <i>lys2<math>\Delta</math>0</i> , <i>nup2::KanMX6</i> ,                                                                                                                                          | Winzeler et al., 1999       |
| Y10407      | <i>nup60<math>\Delta</math></i>         | <i>MAT<math>\alpha</math></i> , <i>leu2<math>\Delta</math>0</i> , <i>ura3<math>\Delta</math>0</i> , <i>lys2<math>\Delta</math>0</i> , <i>nup60::KanMX6</i> ,                                                                                                                                                                           | Winzeler et al., 1999       |
| Y17104      | <i>mlp1<math>\Delta</math></i>          | <i>MAT<math>\alpha</math></i> , <i>leu2<math>\Delta</math>0</i> , <i>his3<math>\Delta</math>1</i> , <i>ura3<math>\Delta</math>0</i> , <i>lys2<math>\Delta</math>0</i> , <i>mlp1::KanMX6</i> ,                                                                                                                                          | Winzeler et al., 1999       |
| Y12308      | <i>mlp2<math>\Delta</math></i>          | <i>MAT<math>\alpha</math></i> , <i>leu2<math>\Delta</math>0</i> , <i>his3<math>\Delta</math>1</i> , <i>ura3<math>\Delta</math>0</i> , <i>lys2<math>\Delta</math>0</i> , <i>mlp2::KanMX6</i> ,                                                                                                                                          | Winzeler et al., 1999       |
| Y11777      | <i>rrp6<math>\Delta</math></i>          | <i>MAT<math>\alpha</math></i> , <i>leu2<math>\Delta</math>0</i> , <i>his3<math>\Delta</math>1</i> , <i>ura3<math>\Delta</math>0</i> , <i>lys2<math>\Delta</math>0</i> , <i>rrp6::KanMX6</i> ,                                                                                                                                          | Winzeler et al., 1999       |
| Y11571      | <i>pml1<math>\Delta</math></i>          | <i>MAT<math>\alpha</math></i> , <i>leu2<math>\Delta</math>0</i> , <i>his3<math>\Delta</math>1</i> , <i>ura3<math>\Delta</math>0</i> , <i>lys2<math>\Delta</math>0</i> , <i>pml1::KanMX6</i> ,                                                                                                                                          | Winzeler et al., 1999       |
| Y04636      | <i>prp18<math>\Delta</math></i>         | <i>MAT<math>\alpha</math></i> , <i>leu2<math>\Delta</math>0</i> , <i>his3<math>\Delta</math>1</i> , <i>ura3<math>\Delta</math>0</i> , <i>met15<math>\Delta</math>0</i> , <i>prp18::KanMX6</i> ,                                                                                                                                        | Winzeler et al., 1999       |
| Y13517      | <i>sac3<math>\Delta</math></i>          | <i>MAT<math>\alpha</math></i> , <i>leu2<math>\Delta</math>0</i> , <i>his3<math>\Delta</math>1</i> , <i>ura3<math>\Delta</math>0</i> , <i>lys2<math>\Delta</math>0</i> , <i>sac3::KanMX6</i> ,                                                                                                                                          | Winzeler et al., 1999       |
| Y16214      | <i>upf1<math>\Delta</math></i>          | <i>MAT<math>\alpha</math></i> , <i>leu2<math>\Delta</math>0</i> , <i>his3<math>\Delta</math>1</i> , <i>ura3<math>\Delta</math>0</i> , <i>lys2<math>\Delta</math>0</i> , <i>upf1::KanMX6</i> ,                                                                                                                                          | Winzeler et al., 1999       |
| Y11905      | <i>upf2<math>\Delta</math></i>          | <i>MAT<math>\alpha</math></i> , <i>leu2<math>\Delta</math>0</i> , <i>his3<math>\Delta</math>1</i> , <i>ura3<math>\Delta</math>0</i> , <i>lys2<math>\Delta</math>0</i> , <i>upf2::KanMX6</i> ,                                                                                                                                          | Winzeler et al., 1999       |
| Y14702      | <i>upf3<math>\Delta</math></i>          | <i>MAT<math>\alpha</math></i> , <i>leu2<math>\Delta</math>0</i> , <i>his3<math>\Delta</math>1</i> , <i>ura3<math>\Delta</math>0</i> , <i>lys2<math>\Delta</math>0</i> , <i>upf3::KanMX6</i> ,                                                                                                                                          | Winzeler et al., 1999       |

|                        |                                    |                                                                                                                               |                                                                                                                        |
|------------------------|------------------------------------|-------------------------------------------------------------------------------------------------------------------------------|------------------------------------------------------------------------------------------------------------------------|
| Y14540                 | <i>xrn1Δ</i>                       | <i>MATα, leu2Δ0, his3Δ1, ura3Δ0, lys2Δ0, xrn1::KanMX6,</i>                                                                    | Winzeler et al., 1999                                                                                                  |
| LGY101                 | <i>nup159-1</i>                    | <i>MATα, leu2Δ1, his3Δ200, ura3-52, rat7-1<sup>ts</sup></i>                                                                   | Gorsch et al., 1995                                                                                                    |
| GFP collection         | <i>X-GFP</i>                       | <i>MATa, leu2Δ0, his3Δ1, ura3Δ0, met15Δ0, X-GFP::HIS3,</i>                                                                    | Huh et al., 2003                                                                                                       |
| RFP references strains | <i>Y-mRFP</i>                      | <i>MATα, leu2Δ0, his3Δ1, ura3Δ0, lys2Δ0, Y-mRFP::KanMX6,</i>                                                                  | Huh et al., 2003                                                                                                       |
| YV726                  | <i>nup157Δ</i>                     | <i>MATα, leu2Δ0, his3Δ1, ura3Δ0, lys2Δ0, nup157::KanMX6</i>                                                                   | <i>NUP157 complete CDS deletion in BY4742<sup>1</sup></i>                                                              |
| YV529                  | <i>GFP-nup133ΔN</i>                | <i>MATa, leu2Δ0, trp1Δ63, ura3-53, arg8Δ0, met14Δ0, lys2Δ202, P2LEU2, nup133::GFP-nup133ΔN, 5' MTD1::URA3</i>                 | Loeillet et al., 2005                                                                                                  |
| YV481                  | <i>mlp2Δ</i>                       | <i>MATα, leu2Δ0, his3Δ1, ura3Δ0, mlp2::URA3,</i>                                                                              | <i>marker swap in Y12308</i>                                                                                           |
| YV500                  | <i>mlp2Δ P2LEU2</i>                | <i>MATa, leu2, trp1, ura3, lys2, met14, arg8, mlp2::URA3, P2LEU2</i>                                                          | <i>segregant of diploid constructed from YV481 and FYAT270-S5</i>                                                      |
| YV554                  | <i>mlp1Δ</i>                       | <i>MATα, leu2Δ0, his3Δ1, ura3Δ0, lys2Δ0, mlp1::HIS3</i>                                                                       | <i>marker swap in Y17104</i>                                                                                           |
| YV555                  | <i>mlp1Δ mlp2Δ</i>                 | <i>MATa, leu2, his3, ura3, lys2, arg8, mlp1::HIS3, mlp2::URA3, P2LEU2</i>                                                     | <i>segregant of diploid constructed from YV500 and YV554</i>                                                           |
| YV678                  | <i>pml39Δ nup133Δ</i>              | <i>MAT?, leu2Δ0, his3, trp1, ura3, lys2, arg8?, met15?, nup133::URA3, pml39::KanMX6, P2LEU2</i>                               | <i>segregant of diploid constructed from YV460 and Y16507</i>                                                          |
| YV615                  | <i>pml39Δ P2LEU2</i>               | <i>MATa, leu2, ura3, lys2, arg8, pml39::URA3, P2LEU2</i>                                                                      | <i>segregant of diploid constructed from FYAT270-S5 and a pml39::URA3 derivative obtained by marker swap in Y16507</i> |
| YV611                  | <i>PML39-GFP</i>                   | <i>MATa, leu2Δ0, trp1Δ63, ura3-53, arg8Δ0, lys2Δ202, met14Δ, P2LEU2, PML39GFP::KanMX6</i>                                     | <i>C-terminal GFP-tagging at PML39 locus in FYAT270-S5</i>                                                             |
| YV612                  | <i>PML39-GFP nup133Δ</i>           | <i>MATa, leu2Δ0, trp1Δ63, ura3-53, arg8Δ0, lys2Δ202, met14Δ, nup133::URA3, P2LEU2</i>                                         | <i>C-terminal GFP-tagging at PML39 locus in YV460</i>                                                                  |
| YV681                  | <i>PML39-mRFP</i>                  | <i>MATα, leu2Δ0, his3Δ1, ura3Δ0, lys2Δ202, PML39-mRFP::KanMX6</i>                                                             | <i>C-terminal mRFP tagging at PML39 locus in BY4742</i>                                                                |
| YV808                  | <i>MLP2-GFP nup133Δ</i>            | <i>MAT?, leu2Δ0, his3Δ1, ura3Δ0, lys2Δ0, met15?, MLP2-GFP::HIS3, nup133::KanMX6</i>                                           | <i>segregant of diploid constructed from MLP2-GFP (GFP collection) and Y15998</i>                                      |
| YV692                  | <i>PML39-GFP SIK1-mRFP</i>         | <i>MATa, leu2Δ0, his3Δ1, ura3Δ0, lys2?, met15?, PML39-GFP::HIS3, SIK1-mRFP::KanMX6</i>                                        | <i>segregant of diploid constructed from PML39-GFP (GFP collection) and SIK1-mRFP reference strain</i>                 |
| mex67-5                | <i>mex67-5</i>                     | <i>MATα, ade2, his3, leu2, trp1, ura3, mex67::HIS3, &lt;pUNI100-mex67-5&gt;</i>                                               | Segref et al., 1997                                                                                                    |
| YV693                  | <i>PML39-GFP SIK1-mRFP mex67-5</i> | <i>MAT?, leu2, his3, trp1?, ura3, lys2?, met15?, mex67::HIS3, PML39-GFP::HIS3, SIK1-mRFP::KanMX6, &lt;pUNI100-mex67-5&gt;</i> | <i>segregant of diploid constructed from YV692 and mex67-5</i>                                                         |
| YV661                  | <i>PML39-GFP nup2Δ</i>             | <i>MAT?, leu2Δ0, his3Δ1, ura3Δ0, lys2?, met15?, nup2::KanMX6, PML39-GFP::HIS3</i>                                             | <i>segregant of diploid constructed from PML39-GFP (GFP collection) and Y15244</i>                                     |
| YV662                  | <i>PML39-GFP nup100Δ</i>           | <i>MAT?, leu2Δ0, his3Δ1, ura3Δ0, lys2?, met15?, nup100::KanMX6, PML39-GFP::HIS3</i>                                           | <i>segregant of diploid constructed from PML39-GFP (GFP collection) and Y14917</i>                                     |

|       |                                    |                                                                                                                                                                                              |                                                                                                |
|-------|------------------------------------|----------------------------------------------------------------------------------------------------------------------------------------------------------------------------------------------|------------------------------------------------------------------------------------------------|
| YV663 | <i>PML39-GFP pom34Δ</i>            | <i>MAT?</i> , <i>leu2Δ0</i> , <i>his3Δ1</i> , <i>ura3Δ0</i> , <i>lys2?</i> , <i>met15?</i> , <i>pom34::KanMX6</i> , <i>PML39-GFP::HIS3</i>                                                   | segregant of diploid constructed from <i>PML39-GFP</i> (GFP collection) and Y11573             |
| YV664 | <i>PML39-GFP pom152Δ</i>           | <i>MAT?</i> , <i>leu2Δ0</i> , <i>his3Δ1</i> , <i>ura3Δ0</i> , <i>lys2?</i> , <i>met15?</i> , <i>pom152::KanMX6</i> , <i>PML39-GFP::HIS3</i>                                                  | segregant of diploid constructed from <i>PML39-GFP</i> (GFP collection) and Y16570             |
| YV665 | <i>PML39-GFP nup170Δ</i>           | <i>MAT?</i> , <i>leu2Δ0</i> , <i>his3Δ1</i> , <i>ura3Δ0</i> , <i>lys2?</i> , <i>met15?</i> , <i>nup170::KanMX6</i> , <i>PML39-GFP::HIS3</i>                                                  | segregant of diploid constructed from <i>PML39-GFP</i> (GFP collection) and Y13105             |
| YV685 | <i>PML39-GFP nup60Δ</i>            | <i>MATα</i> , <i>leu2Δ0</i> , <i>his3Δ1</i> , <i>ura3Δ0</i> , <i>lys2?</i> , <i>met15?</i> , <i>nup60::KanMX6</i> , <i>PML39-GFP::HIS3</i>                                                   | segregant of diploid constructed from <i>PML39-GFP</i> (GFP collection) and Y10407             |
| YV674 | <i>PML39-GFP mlp1Δ</i>             | <i>MAT?</i> , <i>leu2Δ0</i> , <i>his3Δ1</i> , <i>ura3Δ0</i> , <i>lys2?</i> , <i>met15?</i> , <i>mlp1::KanMX6</i> , <i>PML39-GFP::HIS3</i>                                                    | segregant of diploid constructed from <i>PML39-GFP</i> (GFP collection) and Y17104             |
| YV675 | <i>PML39-GFP mlp2Δ</i>             | <i>MAT?</i> , <i>leu2Δ0</i> , <i>his3Δ1</i> , <i>ura3Δ0</i> , <i>lys2?</i> , <i>met15?</i> , <i>mlp2::KanMX6</i> , <i>PML39-GFP::HIS3</i>                                                    | segregant of diploid constructed from <i>PML39-GFP</i> (GFP collection) and Y12308             |
| YV686 | <i>PML39-GFP mlp1Δ mlp2Δ</i>       | <i>MAT?</i> , <i>leu2?</i> , <i>his3</i> , <i>trp1?</i> , <i>ura3</i> , <i>mlp1::KanMX6</i> , <i>mlp2::URA3</i> , <i>PML39-GFP::HIS3</i>                                                     | segregant of diploid constructed from YV674 and YV481                                          |
| YV772 | <i>MLP1-GFP mlp2Δ</i>              | <i>MAT?</i> , <i>leu2Δ0</i> , <i>his3Δ1</i> , <i>ura3Δ0</i> , <i>lys2?</i> , <i>met15?</i> , <i>MLP1-GFP::HIS3</i> , <i>mlp2::KanMX6</i> ,                                                   | segregant of diploid constructed from Y12308 and <i>MLP1-GFP</i> (GFP collection)              |
| YV773 | <i>MLP2-GFP mlp1Δ</i>              | <i>MAT?</i> , <i>leu2Δ0</i> , <i>his3Δ1</i> , <i>ura3Δ0</i> , <i>lys2?</i> , <i>met15?</i> , <i>MLP2-GFP::HIS3</i> , <i>mlp1::KanMX6</i> ,                                                   | segregant of diploid constructed from Y17104 and <i>MLP2-GFP</i> (GFP collection)              |
| YV763 | <i>PML39-ΔC-GFP</i>                | <i>MATα</i> , <i>leu2Δ0</i> , <i>his3Δ1</i> , <i>ura3Δ0</i> , <i>lys2Δ0</i> , <i>PML39-Δ(126-334)-GFP::KanMX6</i>                                                                            | C-terminal tagging at <i>PML39</i> locus in BY4742 <sup>2</sup>                                |
| YV764 | <i>GFP-ΔN-PML39</i>                | <i>MATα</i> , <i>leu2Δ0</i> , <i>his3Δ1</i> , <i>ura3Δ0</i> , <i>lys2Δ0</i> , <i>GFP-Δ(1,125)-PML39</i>                                                                                      | N-terminal GFP tagging at <i>PML39</i> locus in BY4742 followed by marker pop-out <sup>3</sup> |
| YV719 | <i>pml39Δ</i>                      | <i>MATα</i> , <i>leu2</i> , <i>ura3</i> , <i>arg8</i> , <i>lys2Δ0</i> , <i>met14</i> , <i>pml39::LYS2</i> , <i>P2LEU2</i>                                                                    | marker swap in a segregant of diploid constructed from FYAT270-S5 and Y16507                   |
| YV688 | <i>pml39Δ mlp1Δ</i>                | <i>MAT?</i> , <i>leu2</i> , <i>his3?</i> , <i>ura3</i> , <i>lys2</i> , <i>met14?</i> , <i>arg8?</i> , <i>pml39::LYS2</i> , <i>mlp1::kanMX6</i>                                               | segregant of diploid constructed from YV719 and Y17104                                         |
| YV690 | <i>pml39Δ rrp6Δ</i>                | <i>MAT?</i> , <i>leu2</i> , <i>his3?</i> , <i>ura3</i> , <i>lys2</i> , <i>met14?</i> , <i>arg8?</i> , <i>pml39::LYS2</i> , <i>rrp6::kanMX6</i>                                               | segregant of diploid constructed from YV719 and Y11777                                         |
| YV739 | <i>pml39Δ pml1Δ</i>                | <i>MATα</i> , <i>leu2</i> , <i>his3?</i> , <i>ura3 ?</i> , <i>lys2</i> , <i>met15?</i> , <i>arg8?</i> , <i>pml39::LYS2</i> , <i>pml1::KanMX6</i> , <i>P2LEU2</i>                             | segregant of diploid constructed from YV719 and Y11571                                         |
| YV766 | <i>MLP1-mRFP</i>                   | <i>MATα</i> , <i>leu2Δ0</i> , <i>his3Δ1</i> , <i>ura3Δ0</i> , <i>lys2Δ0</i> , <i>MLP1-mRFP::KanMX6</i>                                                                                       | C-terminal mRFP tagging at <i>MLP1</i> locus in BY4742                                         |
| YV767 | <i>NAB2-mRFP</i>                   | <i>MATα</i> , <i>leu2Δ0</i> , <i>his3Δ1</i> , <i>ura3Δ0</i> , <i>lys2Δ0</i> , <i>NAB2-mRFP::KanMX6</i> ,                                                                                     | C-terminal mRFP tagging at <i>NAB2</i> locus in BY4742                                         |
| YV741 | <i>PML39-GFP SPC42-mRFP nup60Δ</i> | <i>MAT?</i> , <i>leu2</i> , <i>his3</i> , <i>ura3</i> , <i>lys2?</i> , <i>met15?</i> , <i>nup60::KanMX6</i> , <i>PML39-GFP::HIS3</i> , <i>SPC42-mRFP::KanMX6</i>                             | segregant of diploid constructed from YV685 and <i>SPC42-mRFP</i> reference strain.            |
| YV752 | <i>PML39-GFP SIK1-mRFP nup60Δ</i>  | <i>MAT?</i> , <i>leu2</i> , <i>his3</i> , <i>ura3</i> , <i>lys2?</i> , <i>met15?</i> , <i>arg8?</i> , <i>nup60::URA3</i> , <i>SIK1-mRFP::KanMX6</i> , <i>PML39-GFP::HIS3</i> , <i>P2LEU2</i> | segregant of diploid constructed from YV692 and YV753                                          |

|         |                                   |                                                                                                  |                                                                                  |
|---------|-----------------------------------|--------------------------------------------------------------------------------------------------|----------------------------------------------------------------------------------|
| YV751   | <i>PML39-mRFP MLP1-GFP</i>        | <i>MATa, leu2, his3, ura3, lys2?, met15?, PML39-mRFP::KanMX6, MLP1-GFP::HIS3</i>                 | <i>segregant of diploid constructed from YV681 and MLP1-GFP (GFP collection)</i> |
| YV683   | <i>PML39-mRFP MLP2-GFP</i>        | <i>MAT?, leu2Δ0, his3Δ200, ura3Δ0, lys2?, met15?, PML39-mRFP::KanMX6, MLP2-GFP::HIS3</i>         | <i>segregant of diploid constructed from MLP2-GFP (GFP collection) and YV681</i> |
| YV774   | <i>PML39-mRFP NAB2-GFP</i>        | <i>MAT?, leu2, his3, ura3, lys2?, met15?, PML39-mRFP::KanMX6, NAB2-GFP::HIS3</i>                 | <i>segregant of diploid constructed from YV754 and NAB2-GFP (GFP collection)</i> |
| YV753   | <i>nup60Δ</i>                     | <i>MATα, leu2Δ0, ura3Δ0, lys2Δ0, nup60::URA3</i>                                                 | <i>marker swap in Y10407</i>                                                     |
| YV754   | <i>PML39-mRFP nup60Δ</i>          | <i>MAT?, leu2, his3, ura3, lys2?, met15?, nup60::URA3, PML39-mRFP::KanMX6</i>                    | <i>segregant of diploid constructed from YV751 and YV753</i>                     |
| YV702   | <i>PML39-mRFP MLP1-GFP nup60Δ</i> | <i>MAT?, leu2, his3, ura3, lys2?, met15?, nup60::URA3, PML39-mRFP::KanMX6, MLP1-GFP::HIS3</i>    | <i>segregant of diploid constructed from YV751 and YV753</i>                     |
| YV755   | <i>PML39-mRFP MLP2-GFP nup60Δ</i> | <i>MAT?, leu2, his3, ura3, lys2?, met15?, nup60::URA3, PML39-mRFP::KanMX6, MLP2-GFP::HIS3</i>    | <i>segregant of diploid constructed from YV754 and MLP2-GFP (GFP collection)</i> |
| YV756   | <i>PML39-mRFP NAB2-GFP nup60Δ</i> | <i>MAT?, leu2, his3, ura3, lys2?, met15?, nup60::URA3, PML39-mRFP::KanMX6, NAB2-GFP::HIS3</i>    | <i>segregant of diploid constructed from YV754 and NAB2-GFP (GFP collection)</i> |
| YV757   | <i>PML39-mRFP YRA1-GFP nup60Δ</i> | <i>MAT?, leu2, his3, ura3, lys2?, met15?, nup60::URA3, PML39-mRFP::KanMX6, YRA1-GFP::HIS3</i>    | <i>segregant of diploid constructed from YV754 and YRA1-GFP (GFP collection)</i> |
| YV758   | <i>PML39-mRFP ULP1-GFP nup60Δ</i> | <i>MAT?, leu2, his3, ura3, lys2?, met15?, nup60::URA3, PML39-mRFP::KanMX6, ULP1-GFP::HIS3</i>    | <i>segregant of diploid constructed from YV754 and ULP1-GFP (GFP collection)</i> |
| YV759   | <i>PML39-mRFP MSL5-GFP nup60Δ</i> | <i>MAT?, leu2, his3, ura3, lys2?, met15?, nup60::URA3, PML39-mRFP::KanMX6, MSL5-GFP::HIS3</i>    | <i>segregant of diploid constructed from YV754 and MSL5-GFP (GFP collection)</i> |
| YV760   | <i>PML39-mRFP NPL3-GFP nup60Δ</i> | <i>MAT?, leu2, his3, ura3, lys2?, met15?, nup60::URA3, PML39-mRFP::KanMX6, NPL3-GFP::HIS3</i>    | <i>segregant of diploid constructed from YV754 and NPL3-GFP (GFP collection)</i> |
| YV761   | <i>PML39-mRFP PML1-GFP nup60Δ</i> | <i>MAT?, leu2, his3, ura3, lys2?, met15?, nup60::URA3, PML39-mRFP::KanMX6, PML1-GFP::HIS3</i>    | <i>segregant of diploid constructed from YV754 and PML1-GFP (GFP collection)</i> |
| FSY1026 | <i>YRA1 shuffle</i>               | <i>MATa, ade2, leu2, his3, trp1, ura3, yra1::HIS3, &lt;pURA3-YRA1 ; pFS1876&gt;</i>              | <i>Vinciguerra et al., 2005</i>                                                  |
| YV769   | <i>YRA1 shuffle</i>               | <i>MATa, ade2, leu2, his3, ura3, yra1::HIS3, &lt;pURA3-YRA1 ; pFS1876&gt;</i>                    | <i>TRP1 insertion in FSY1026<sup>4</sup></i>                                     |
| FSY1284 | <i>YRA1 shuffle mlp2Δ</i>         | <i>MATa, ade2, leu2, his3, trp1, ura3, yra1::HIS3, mlp2::TRP1, &lt;pURA3-YRA1 ; pFS1876&gt;</i>  | <i>Vinciguerra et al., 2005</i>                                                  |
| YV768   | <i>YRA1 shuffle pml39Δ</i>        | <i>MATa, ade2, leu2, his3, trp1, ura3, yra1::HIS3, pml39::TRP1, &lt;pURA3-YRA1 ; pFS1876&gt;</i> | <i>PML39 complete CDS deletion in FSY1026<sup>l</sup></i>                        |
| ACY429  | <i>NAB2 shuffle</i>               | <i>MATα, leu2, his3, trp1, ura3, nab2::HIS3, &lt;pURA3-NAB2 ; pAC636&gt;</i>                     | <i>Green et al., 2003</i>                                                        |
| YV771   | <i>NAB2 shuffle</i>               | <i>MATα, leu2, his3, ura3, nab2::HIS3, &lt;pURA3-NAB2 ; pAC636&gt;</i>                           | <i>TRP1 insertion in ACY429<sup>4</sup></i>                                      |

|         |                            |                                                                                           |                                                          |
|---------|----------------------------|-------------------------------------------------------------------------------------------|----------------------------------------------------------|
| FSY2081 | <i>NAB2 shuffle mlp1Δ</i>  | <i>MATα, leu2, his3, trp1, ura3, nab2::HIS3, mlp1::TRP1, &lt;pURA3-NAB2 ; pAC636&gt;</i>  | <i>Vinciguerra et al., 2005</i>                          |
| FSY2082 | <i>NAB2 shuffle mlp2Δ</i>  | <i>MATα, leu2, his3, trp1, ura3, nab2::HIS3, mlp2::TRP1, &lt;pURA3-NAB2 ; pAC636&gt;</i>  | <i>Vinciguerra et al., 2005</i>                          |
| YV770   | <i>NAB2 shuffle pml39Δ</i> | <i>MATα, leu2, his3, trp1, ura3, nab2::HIS3, pml39::TRP1, &lt;pURA3-NAB2 ; pAC636&gt;</i> | <i>PML39 complete CDS deletion in ACY429<sup>1</sup></i> |

---

<sup>1</sup> Marker insertion precisely removed the concerned CDS from ATG to STOP.

<sup>2</sup> Deletion of aminoacids 126 to 334 from Pml39 was achieved through direct homologous recombination of the GFP tag in fusion with aminoacid 125 at the *PML39* locus.

<sup>3</sup> Deletion of aminoacids 1 to 125 from Pml39 was obtained by insertion of the GFP tag upstream from aminoacid 126 at the *PML39* locus.

<sup>4</sup> TRP1 marker was amplified from pFA6a-TRP1 and integrated at its cognate locus in *trp1*- strains FSY1026 and ACY429. This modification allows a significant comparison with shuffle strains deleted for genes of interest using the TRP1 marker.

## **Supplemental table 2 – Plasmids used in this study**

| <b><i>Name</i></b>                | <b><i>Markers</i></b> | <b><i>Reference</i></b>     |
|-----------------------------------|-----------------------|-----------------------------|
| pUN100-GFP-NUP49                  | CEN, LEU2             | Doye et al., 1994           |
| PUN100- <i>mex67-ts5</i>          | CEN, LEU2             | Segref et al., 1997         |
| pYX213                            | 2 $\mu$ , URA3        | R & D systems               |
| pYX214                            | 2 $\mu$ , LYS2        | This study <sup>a</sup>     |
| pYX213-PML39-GFP                  | 2 $\mu$ , URA3        | This study <sup>a</sup>     |
| pYX214-PML39-GFP                  | 2 $\mu$ , LYS2        | This study <sup>a</sup>     |
| pAS $\Delta\Delta$                | 2 $\mu$ , TRP1        | Fromont-Racine et al., 1997 |
| pAS $\Delta\Delta$ -PML39 1-334   | 2 $\mu$ , TRP1        | This study <sup>b</sup>     |
| pAS $\Delta\Delta$ -PML39 126-334 | 2 $\mu$ , TRP1        | This study <sup>b</sup>     |
| pAS $\Delta\Delta$ -PML39 1-126   | 2 $\mu$ , TRP1        | This study <sup>b</sup>     |
| pACTII                            | 2 $\mu$ , LEU2        | Fromont-Racine et al., 1997 |
| pACTII-MLP1-7-143                 | 2 $\mu$ , LEU2        | This study <sup>c</sup>     |
| pACTII-MLP1-287-584               | 2 $\mu$ , LEU2        | This study <sup>c</sup>     |
| pACTII-MLP2-1-120                 | 2 $\mu$ , LEU2        | This study <sup>c</sup>     |
| pLGSD5                            | 2 $\mu$ , URA3        | Legrain and Rosbash, 1989   |
| pJCR51                            | 2 $\mu$ , URA3        | Legrain and Rosbash, 1989   |
| pJCR1                             | 2 $\mu$ , URA3        | Legrain and Rosbash, 1989   |
| pJCR1 mut 5'SS                    | 2 $\mu$ , URA3        | Rain and Legrain, 1997      |
| pJCR1 mut BP                      | 2 $\mu$ , URA3        | Rain and Legrain, 1997      |
| pFS2555/YCpLac111-YRA1            | CEN, LEU2             | Vinciguerra et al., 2005    |
| pFS2554/YCpLac111- <i>yra1-8</i>  | CEN, LEU2             | Zenklusen et al., 2002      |
| pAC717/pRS315-NAB2                | CEN, LEU2             | Green et al., 2003          |
| pAC1152/pRS315- $\Delta$ N-nab2   | CEN, LEU2             | Marfatia et al., 2003       |
| pFA6a-TRP1                        | TRP1                  | Longtine et al., 1998       |
| pFA6a-GFP(S65T)-KanMX6            | KanMX6                | Longtine et al., 1998       |
| pFA6a-mRFP-KanMX6                 | KanMX6                | Huh et al., 2003            |

<sup>a</sup> To generate the pYX213-PML39-GFP overexpression constructs, the *PML39-GFP* coding sequence was PCR amplified from genomic DNA extracted from the PML39-GFP strain (YV611) and cloned downstream the GAL1 promoter in the pYX213 vector (R & D Systems). For construction of pYX214 and pYX214-PML39-GFP plasmids, the *ura3::LYS2* conversion cassette ((Voth *et al.*, 2003)) was contra-transformed in yeast with pYX213 and pYX213-PML39-GFP, respectively and *ura3- LYS2+* clones were selected. Plasmids were rescued in *E. coli* and checked by restriction analysis.

<sup>b</sup> To generate the 2-hybrid bait constructs, *PML39* coding sequences (full-length or partial) were amplified from the pYX213-PML39-GFP vector and cloned downstream of the GAL4 DNA binding domain in the pAS $\Delta\Delta$  vector ((Fromont-Racine *et al.*, 1997)).

<sup>c</sup> pACTII prey plasmids containing the indicated inserts were rescued from the FRYL library during the course of the 2-hybrid screen.

## References to Supplemental Tables

- Doye, V., Wepf, R., and Hurt, E.C. (1994). A novel nuclear pore protein Nup133p with distinct roles in poly(A)<sup>+</sup> RNA transport and nuclear pore distribution. *EMBO J.* *13*, 6062-6075.
- Fromont-Racine, M., Rain, J.C., and Legrain, P. (1997). Toward a functional analysis of the yeast genome through exhaustive two-hybrid screens. *Nat. Genet.* *16*, 277-282.
- Gorsch, L.C., Dockendorff, T.C., and Cole, C.N. (1995). A conditional allele of the novel repeat-containing yeast nucleoporin RAT7/NUP159 causes both rapid cessation of mRNA export and reversible clustering of nuclear pore complexes. *J. Cell Biol.* *129*, 939-955.
- Green, D.M., Johnson, C.P., Hagan, H., and Corbett, A.H. (2003). The C-terminal domain of myosin-like protein 1 (Mlp1p) is a docking site for heterogeneous nuclear ribonucleoproteins that are required for mRNA export. *Proc Natl Acad Sci U S A* *100*, 1010-1015.
- Huh, W.K., Falvo, J.V., Gerke, L.C., Carroll, A.S., Howson, R.W., Weissman, J.S., and O'Shea, E.K. (2003). Global analysis of protein localization in budding yeast. *Nature* *425*, 686-691.
- Legrain, P., and Rosbash, M. (1989). Some cis- and trans-acting mutants for splicing target pre-mRNA to the cytoplasm. *Cell* *57*, 573-583.
- Loeillet, S., Palancade, B., Cartron, M., Thiery, A., Richard, G.-F., Dujon, B., Doye, V., and Nicolas, A. (2005). Genetic network interactions among replication, repair and nuclear pore deficiencies in yeast. *DNA Repair* *4*, 459-468
- Longtine, M.S., McKenzie, A., 3rd, Demarini, D.J., Shah, N.G., Wach, A., Brachat, A., Philippsen, P., and Pringle, J.R. (1998). Additional modules for versatile and economical PCR-based gene deletion and modification in *Saccharomyces cerevisiae*. *Yeast* *14*, 953-961.
- Marfatia, K.A., Crafton, E.B., Green, D.M., and Corbett, A.H. (2003). Domain analysis of the *Saccharomyces cerevisiae* heterogeneous nuclear ribonucleoprotein, Nab2p. Dissecting the requirements for Nab2p-facilitated poly(A) RNA export. *J Biol Chem* *278*, 6731-6740.
- Rain, J.C., and Legrain, P. (1997). In vivo commitment to splicing in yeast involves the nucleotide upstream from the branch site conserved sequence and the Mud2 protein. *Embo J* *16*, 1759-1771.
- Segref, A., Sharma, K., Doye, V., Hellwing, A., Huber, J., Lührmann, R., and Hurt, E.C. (1997). Mex67p, a novel factor for nuclear mRNA export binds to both poly(A)<sup>+</sup> RNA and nuclear pores. *EMBO J.* *16*, 3256-3271.

Vinciguerra, P., Iglesias, N., Camblong, J., Zenklusen, D., and Stutz, F. (2005). Perinuclear Mlp proteins downregulate gene expression in response to a defect in mRNA export. *Embo J* 24, 813-823.

Voth, W.P., Jiang, Y.W., and Stillman, D.J. (2003). New 'marker swap' plasmids for converting selectable markers on budding yeast gene disruptions and plasmids. *Yeast* 20, 985-993.

Winzeler, E.A., et al. (1999). Functional characterization of the *S. cerevisiae* genome by gene deletion and parallel analysis. *Science* 285, 901-906.

Zenklusen, D., Vinciguerra, P., Wyss, J.C., and Stutz, F. (2002). Stable mRNP formation and export require cotranscriptional recruitment of the mRNA export factors Yra1p and Sub2p by Hpr1p. *Mol Cell Biol* 22, 8241-8253.
