# Supplementary material
Source: PubMed Central journal article supplement (PMC1266424)

Supplemental Figure 1 - *Palancade et al.*

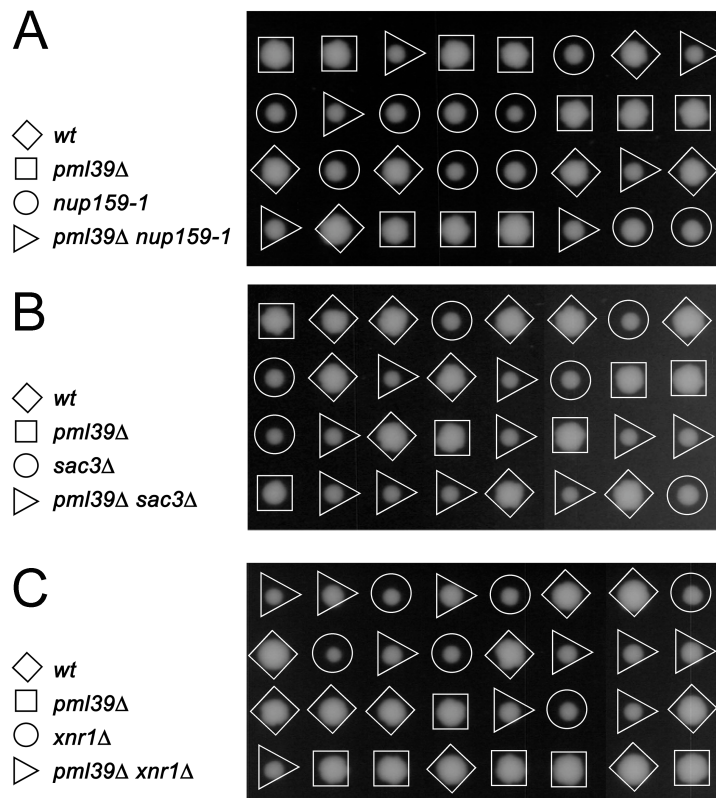

Supplement: mbc_E05-06-0527_1.pdf [file mbc_E05-06-0527_1.pdf]

Supplemental Figure 2 - Palancade et al.

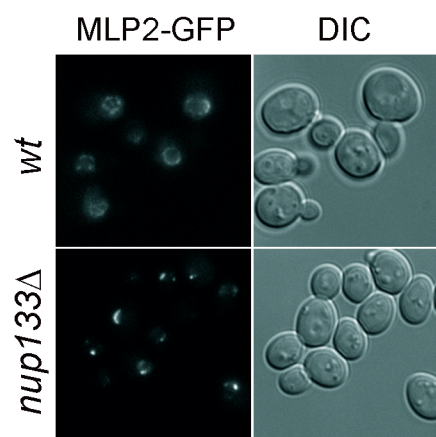

Supplement: mbc_E05-06-0527_2.pdf [file mbc_E05-06-0527_2.pdf]
